# Supplementary material
Source: MDPI journal article supplement (https://www.mdpi.com/2073-4395/10/3/377)
Supplement: s1 [file s1]

Supplementary material

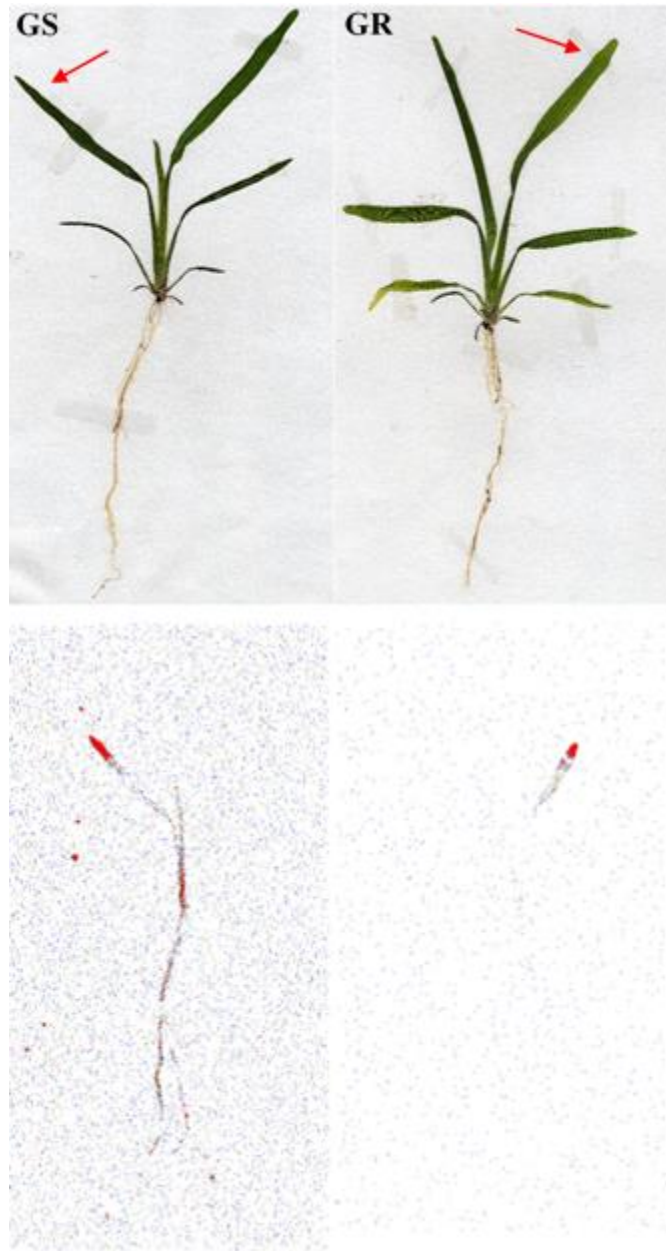

**Figure S1.** Visualization of  $^{14}\text{C}$ -glyphosate in the GS and GR populations of *C. distichophylla* plants at 96 HAT. The highest concentration of  $^{14}\text{C}$ -glyphosate is highlighted in red. Arrows indicate the treated leaves.
